# Supplementary material for: Genomic content typifying a prevalent clade of bovine mastitis-associated Escherichia coli
Source: PubMed Central journal article supplement (PMC4951805; doi:10.1038/srep30115), 2016-07-20
Supplement: srep30115-s1.pdf [file srep30115-s1.pdf]

**Genomic content typifying a prevalent clade of bovine mastitis-associated *Escherichia coli*:**

**Additional information**

Robert J. Goldstone<sup>1</sup>

Susan Harris<sup>1</sup>

David G. E. Smith<sup>1,\*</sup>

<sup>1</sup> Heriot-Watt University, School of Life Sciences, Edinburgh Campus, EH14 4AS

\*Corresponding author

Additional figure S1

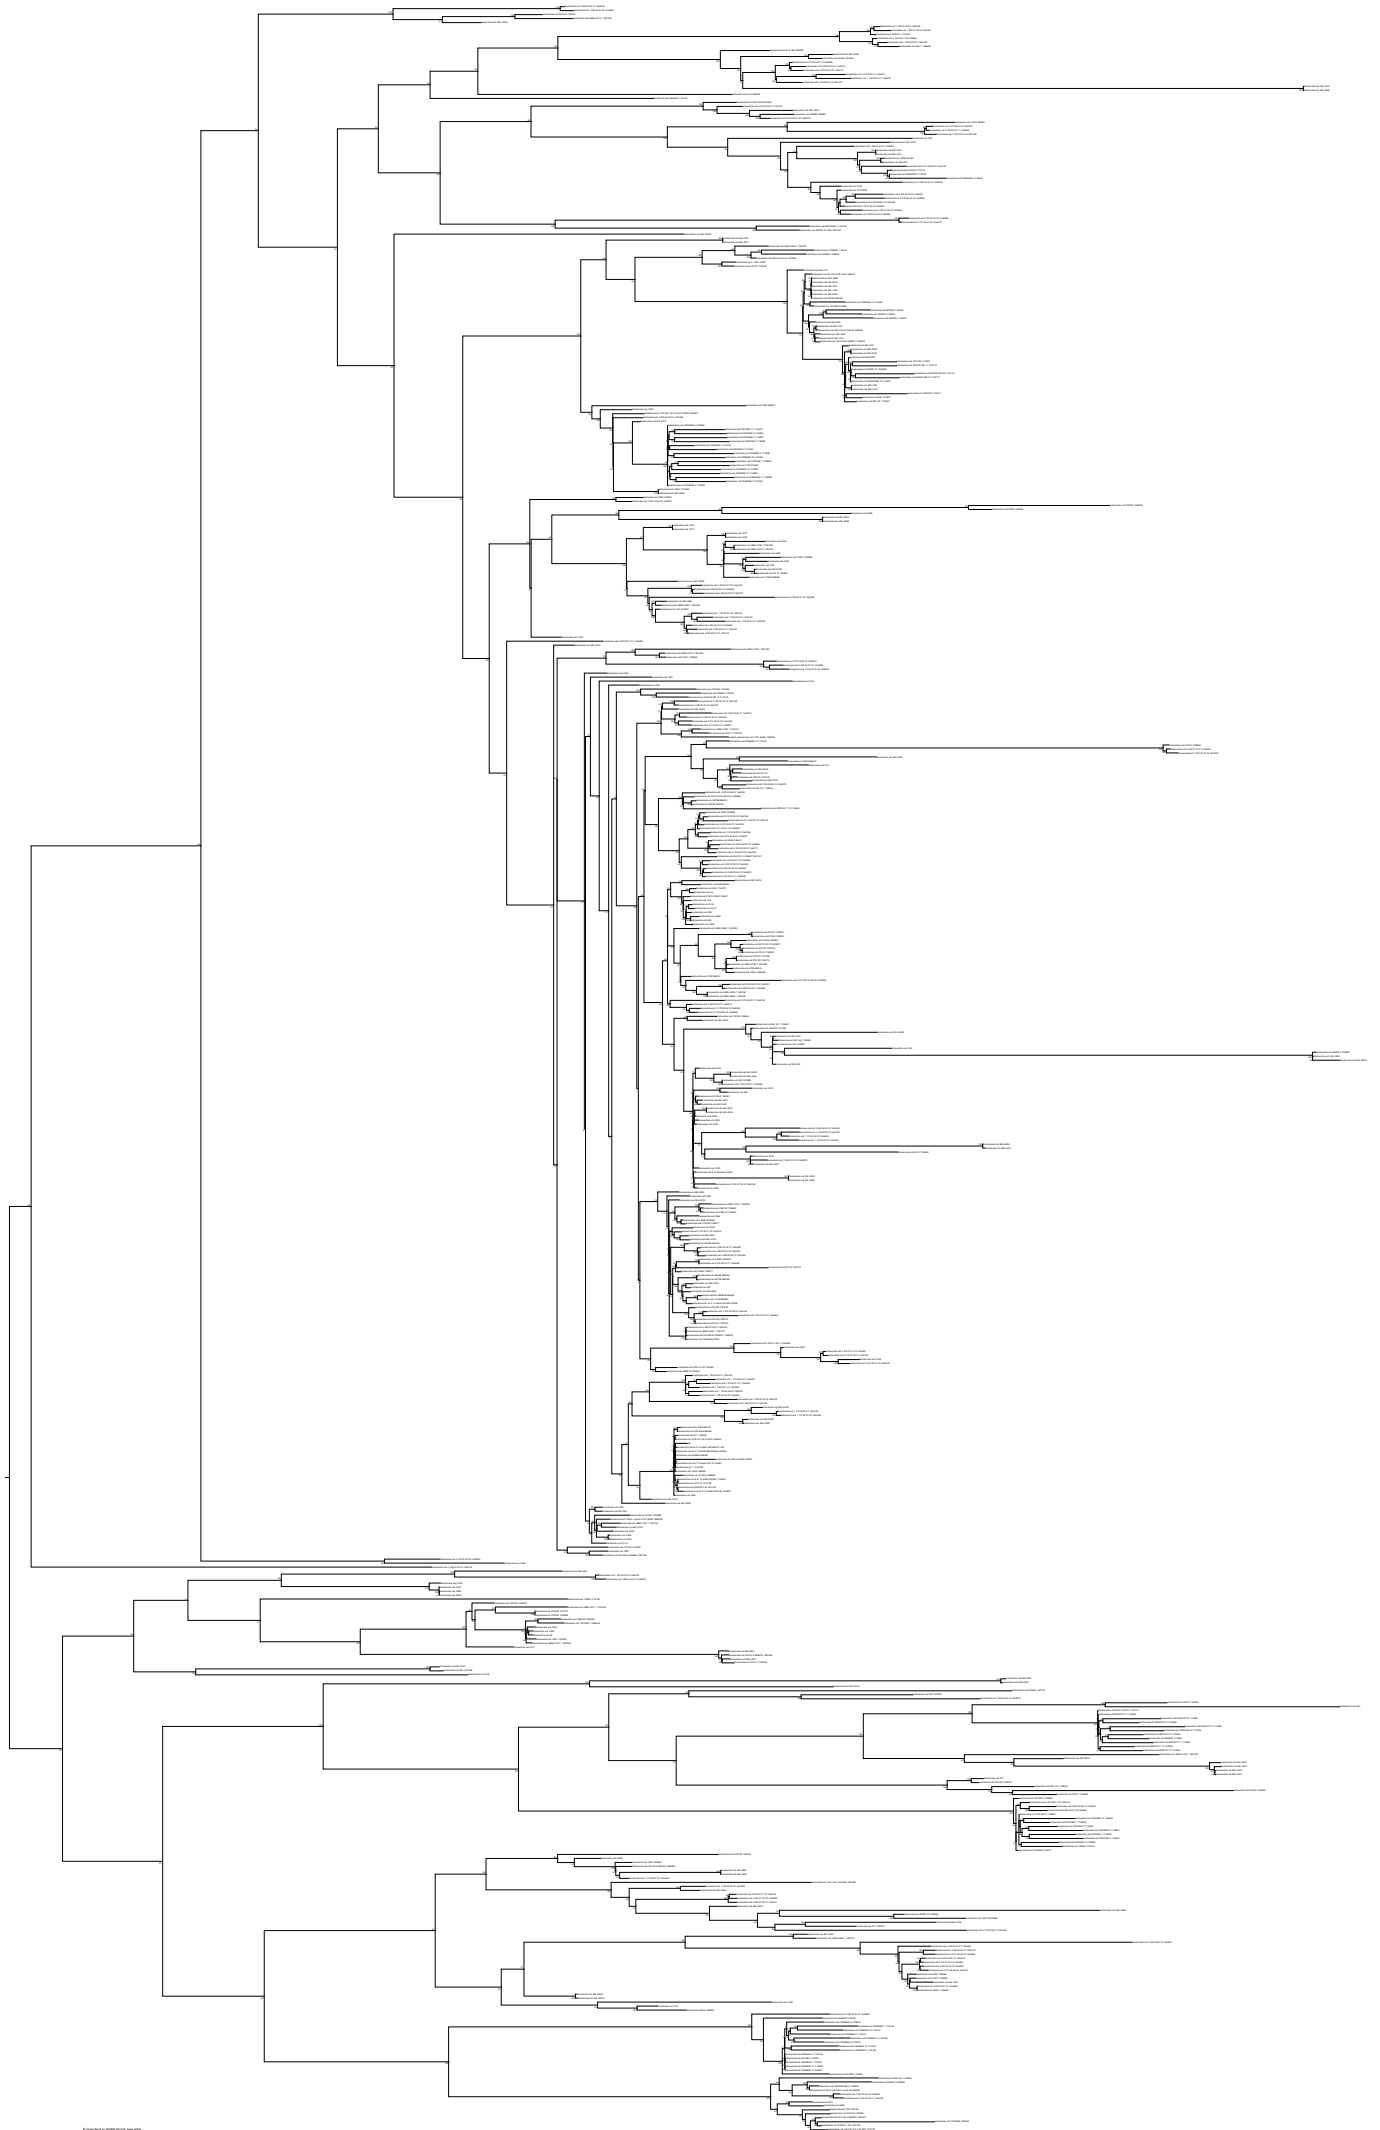

Figure S1. Maximum likelihood phylogenetic tree for 533 phylogroup A *E. coli* genome sequences constructed using the concatenated sequences for 520 core genes. Bootstrap values (100 replicates) are shown.

## **Additional figure S2:**

**Does the uneven representation of *E. coli* from different countries or ecological niches in the sequenced *E. coli* phylogroup A strains compromise the representation of the diversity in the sequenced population?**

Despite the possible biases in the sampling of *E. coli* which have been used for genome sequencing, many of which come from humans, including a large cohort of sequences from Bangladesh, the USA or Tanzania, we observe that the phylogenetic diversity of phylogroup A is well saturated by the whole sample and that neither country nor host origin bias representativeness.

To demonstrate this we performed an analysis in which, by comparing a single query genome against numerically increasing random samples of the population (over 10,000 replications per data point), we ask how similar the query strain is to its most similar neighbour in the sample. This analysis provides a description of how similar a newly sequenced genome can be expected to be to one already present in the sequenced population, depending on the size of the sequenced population. Figure S2 shows that as individuals are added to the sequenced population the average minimum distance observed between a query genome and a genome already present in the sequenced population rapidly approaches zero. In fact, at the end of the sampling the average minimum distance observed between a new and a previously seen strain ( $d \approx 0.0005$ ) is broadly equivalent to the evolutionary distance between several of the *E. coli* K-12 laboratory variants, such as DH5- $\alpha$  and S17 ( $d = 0.0005$ ). These data indicate that a newly sequenced phylogroup A *E. coli* can be expected to be, on average, as similar to at least one previously sequenced isolate as the evolutionary distance between K-12 variants, which are of negligible evolutionary distance. This would suggest that the phylogeny of phylogroup A *E. coli* is incredibly well explored and substantially

reduces the possibility of any bias introduced by uneven representation of *E. coli* from different environmental and geographical niches.

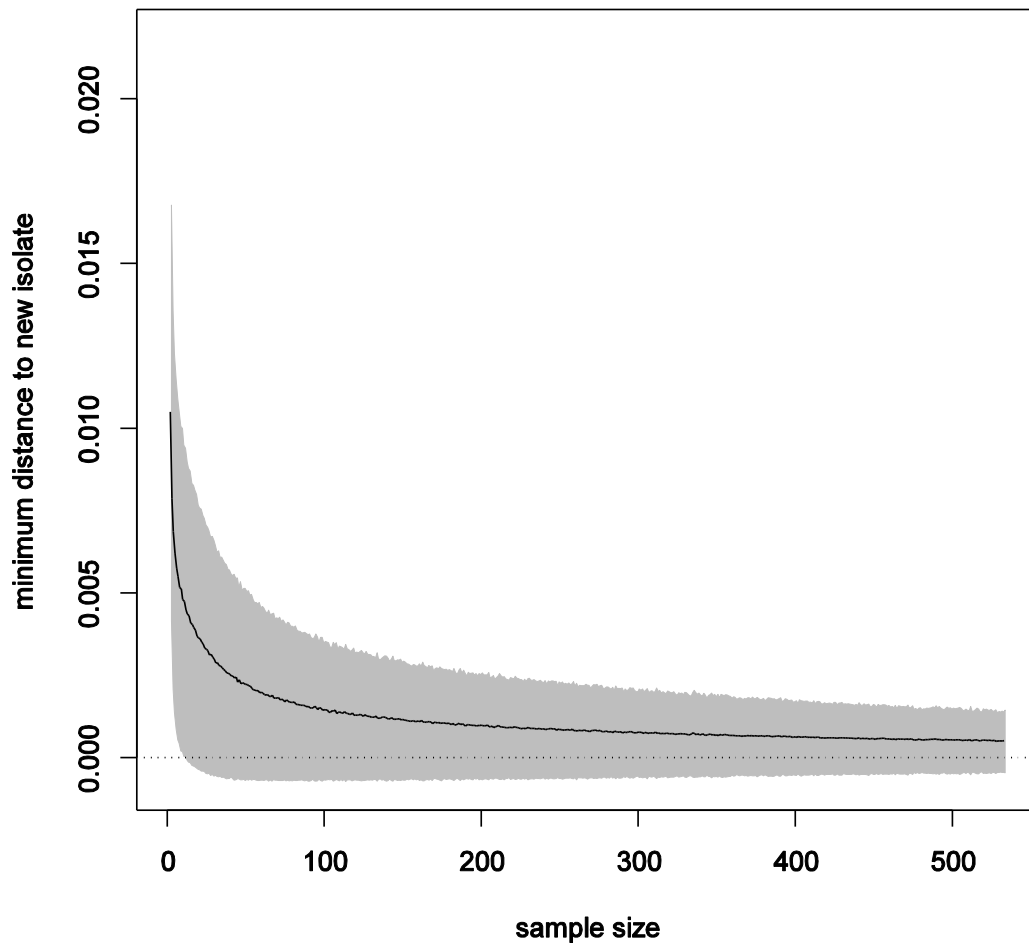

Figure S2. The distance between a new genome and those present in a sequenced population of increasing sizes. These data show that as the size of the previously sequenced population (sample size) increases, the distance (solid black curve) found between this strain and its nearest neighbour in the sequenced population decreases rapidly. The grey polygon surrounding the curve represents the standard deviation of distances, based on 10,000 replications per data point. These data indicate that the overall phylogenetic representation of phylogroup A is not compromised by biases inherent in the sampling of global *E. coli* which have been sequenced.

Additional Figure S2. Modelling the interaction between the numerical abundance of a gene and the likelihood that gene will be captured in the core genome of sampled strains

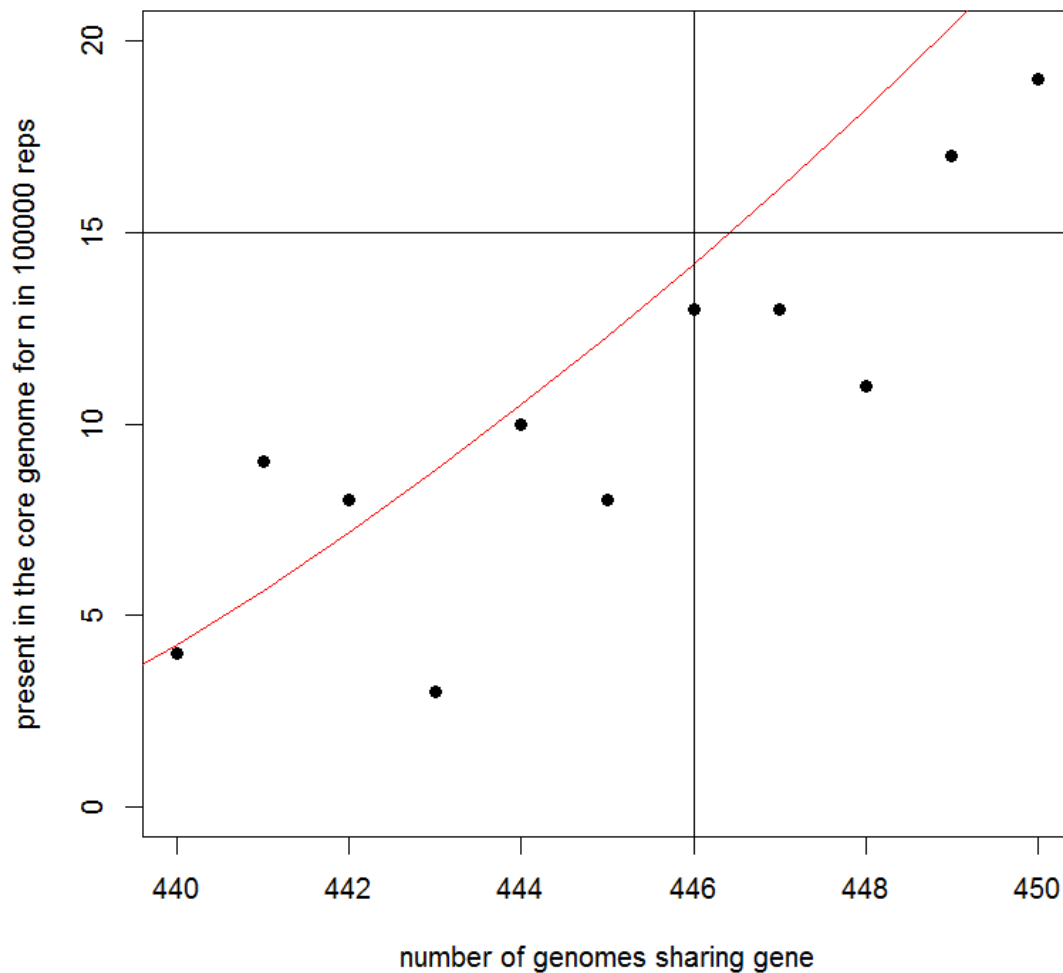

Figure S2. The interaction between the abundance of a gene in a population of 533 genomes and the number of times that gene is found in at least 65/ 66 sampled strains. To identify the genes which comprise the specific PAMPEC core genome, first we wanted to investigate how numerically abundant a gene needed to be in a population of 533 strains to be captured in the core genome of 66 randomly sampled genomes captured we modelled how the numerical abundance of a gene in a population of 533 *E. coli* affected the number of times that gene could be expected to be captured in the core genome of 100,000 random samples of 66 strains. To do this, we simulated random

distributions of increasing numbers of homologues (from 1 to 533) in 533 genomes over 100,000 replications per data point. For each replication, we sampled 66 random genomes and counted how many times a gene with that numerical abundance in 533 genomes appeared in at least 65 of the 66 sampled genomes. We then fit a curve to this data using the 'lm' function within R using the third degree polynomial. Since our data intimated that randomly sampled *E. coli* could be expected to be as closely related to each other as MPEC are 15 in 100,000 times, we set the lower limit of the number of times a homologue could be detected in at least 65 / 66 sampled strains to be considered 'core', also, as 15 in 100,000. By extrapolating from the fitted curve, we found that if a homologue was present in more than 446 / 533 genomes, that homologue could be expected to be captured in at least 65 / 66 strains greater than 15 in 100,000 times. In this way, we defined specific PAMPEC core genes as those present in at least 65 of 66 PAMPEC genomes, but 446 or fewer of the 533 phylogroup A genomes.

Additional figure S3. Deletion of regions of the *paa* locus in some MPECs

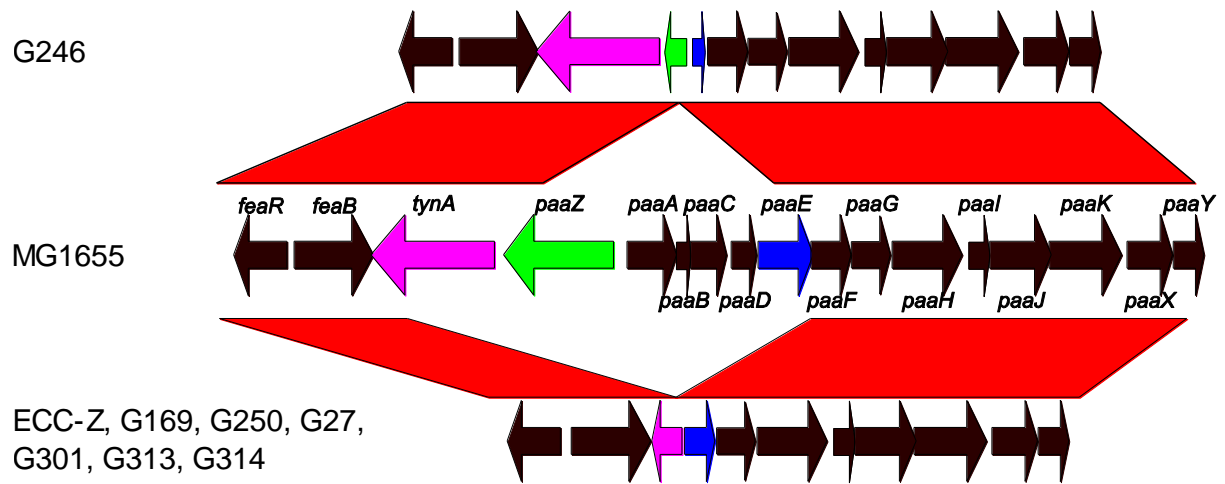

Figure S3. Deletion of some genes in the *paa* locus in a subset of MPEC. By comparing the *paa* locus from MG1655 to several MPEC genomes we identified 7 genomes which had a deletion in the region comprising *tynA-paaZAECDE*, and one further genome with a separate deletion in *paaZABCDE*.



Additional table 2. A list of genes used for the phylogenetic analysis of phylogroup A genomes. This list gives the “b” designations from the MG1655 genome (uid:U00096).

|       |       |       |       |       |       |
|-------|-------|-------|-------|-------|-------|
| b0006 | b0391 | b0707 | b0881 | b1179 | b1709 |
| b0009 | b0393 | b0721 | b0891 | b1184 | b1710 |
| b0010 | b0394 | b0722 | b0893 | b1187 | b1723 |
| b0014 | b0399 | b0728 | b0896 | b1194 | b1725 |
| b0015 | b0401 | b0734 | b0898 | b1207 | b1728 |
| b0050 | b0404 | b0735 | b0907 | b1208 | b1739 |
| b0055 | b0405 | b0738 | b0911 | b1209 | b1749 |
| b0058 | b0409 | b0750 | b0920 | b1213 | b1765 |
| b0080 | b0411 | b0751 | b0921 | b1219 | b1768 |
| b0083 | b0413 | b0753 | b0922 | b1232 | b1778 |
| b0087 | b0421 | b0754 | b0923 | b1233 | b1782 |
| b0089 | b0422 | b0755 | b0945 | b1236 | b1784 |
| b0091 | b0424 | b0782 | b0958 | b1242 | b1795 |
| b0094 | b0430 | b0785 | b0960 | b1243 | b1802 |
| b0103 | b0432 | b0791 | b0962 | b1245 | b1806 |
| b0104 | b0436 | b0795 | b0963 | b1246 | b1807 |
| b0108 | b0443 | b0796 | b0964 | b1253 | b1808 |
| b0110 | b0446 | b0798 | b0965 | b1254 | b1825 |
| b0129 | b0450 | b0802 | b0966 | b1255 | b1840 |
| b0147 | b0453 | b0804 | b0970 | b1275 | b1841 |
| b0154 | b0454 | b0807 | b1000 | b1282 | b1846 |
| b0157 | b0463 | b0810 | b1009 | b1293 | b1848 |
| b0158 | b0472 | b0811 | b1010 | b1299 | b1850 |
| b0166 | b0475 | b0812 | b1013 | b1429 | b1856 |
| b0169 | b0487 | b0814 | b1048 | b1452 | b1857 |
| b0170 | b0490 | b0815 | b1054 | b1521 | b1861 |
| b0171 | b0528 | b0817 | b1056 | b1531 | b1865 |
| b0172 | b0605 | b0824 | b1061 | b1608 | b1874 |
| b0173 | b0607 | b0825 | b1064 | b1609 | b1905 |
| b0174 | b0611 | b0828 | b1066 | b1635 | b2101 |
| b0176 | b0614 | b0832 | b1069 | b1636 | b2134 |
| b0178 | b0618 | b0835 | b1103 | b1637 | b2137 |
| b0179 | b0620 | b0836 | b1104 | b1638 | b2150 |
| b0187 | b0623 | b0838 | b1105 | b1640 | b2151 |
| b0196 | b0624 | b0841 | b1106 | b1641 | b2153 |
| b0200 | b0628 | b0843 | b1110 | b1643 | b2158 |
| b0213 | b0630 | b0853 | b1116 | b1651 | b2179 |
| b0215 | b0631 | b0858 | b1120 | b1655 | b2181 |
| b0222 | b0638 | b0862 | b1132 | b1656 | b2187 |
| b0384 | b0658 | b0864 | b1133 | b1662 | b2197 |
| b0386 | b0659 | b0865 | b1134 | b1676 | b2203 |
| b0388 | b0683 | b0876 | b1174 | b1703 | b2204 |

|       |       |       |       |       |       |
|-------|-------|-------|-------|-------|-------|
| b2205 | b2617 | b3151 | b3348 | b3705 | b3960 |
| b2218 | b2618 | b3152 | b3351 | b3725 | b3964 |
| b2236 | b2668 | b3153 | b3354 | b3735 | b3973 |
| b2237 | b2669 | b3154 | b3357 | b3738 | b3974 |
| b2241 | b2671 | b3163 | b3364 | b3742 | b4012 |
| b2250 | b2682 | b3164 | b3386 | b3764 | b4023 |
| b2267 | b2684 | b3165 | b3389 | b3780 | b4046 |
| b2280 | b2689 | b3167 | b3391 | b3784 | b4056 |
| b2282 | b2702 | b3175 | b3394 | b3786 | b4059 |
| b2285 | b2748 | b3177 | b3395 | b3790 | b4062 |
| b2287 | b2749 | b3188 | b3397 | b3791 | b4063 |
| b2288 | b2750 | b3189 | b3399 | b3793 | b4135 |
| b2290 | b2780 | b3191 | b3405 | b3806 | b4136 |
| b2295 | b2782 | b3192 | b3414 | b3810 | b4141 |
| b2296 | b2793 | b3194 | b3415 | b3811 | b4147 |
| b2303 | b2809 | b3195 | b3416 | b3812 | b4149 |
| b2311 | b2811 | b3198 | b3417 | b3824 | b4154 |
| b2313 | b2812 | b3199 | b3424 | b3825 | b4160 |
| b2316 | b2818 | b3204 | b3437 | b3827 | b4161 |
| b2319 | b2825 | b3205 | b3453 | b3832 | b4162 |
| b2323 | b2828 | b3206 | b3460 | b3836 | b4171 |
| b2398 | b2829 | b3228 | b3461 | b3838 | b4178 |
| b2416 | b2832 | b3230 | b3466 | b3842 | b4188 |
| b2432 | b2837 | b3231 | b3467 | b3848 | b4201 |
| b2436 | b2891 | b3233 | b3471 | b3850 | b4203 |
| b2477 | b2895 | b3235 | b3472 | b3869 | b4214 |
| b2478 | b2897 | b3236 | b3473 | b3871 | b4232 |
| b2513 | b2899 | b3238 | b3475 | b3887 | b4236 |
| b2525 | b2900 | b3239 | b3478 | b3892 | b4237 |
| b2527 | b2927 | b3248 | b3499 | b3919 | b4259 |
| b2528 | b2936 | b3249 | b3503 | b3921 | b4362 |
| b2529 | b2946 | b3250 | b3560 | b3922 | b4363 |
| b2533 | b2951 | b3251 | b3570 | b3924 | b4372 |
| b2540 | b2990 | b3255 | b3592 | b3926 | b4395 |
| b2552 | b2992 | b3257 | b3602 | b3927 | b4397 |
| b2553 | b2993 | b3260 | b3611 | b3930 | b4398 |
| b2559 | b3005 | b3279 | b3634 | b3931 | b4461 |
| b2565 | b3011 | b3282 | b3635 | b3932 | b4554 |
| b2568 | b3032 | b3283 | b3643 | b3933 |       |
| b2570 | b3034 | b3295 | b3646 | b3934 |       |
| b2571 | b3058 | b3303 | b3648 | b3936 |       |
| b2573 | b3059 | b3314 | b3649 | b3937 |       |
| b2587 | b3068 | b3321 | b3654 | b3941 |       |
| b2595 | b3071 | b3340 | b3666 | b3945 |       |
| b2597 | b3148 | b3341 | b3668 | b3958 |       |
| b2608 | b3149 | b3342 | b3697 | b3959 |       |
